# Supplementary material
Source: PubMed Central journal article supplement (PMC6511306)

Supplemental Figure 1. Monocyte gating strategy. Sequential gating to identify monocyte subpopulations based on CD14 and CD16 expression.

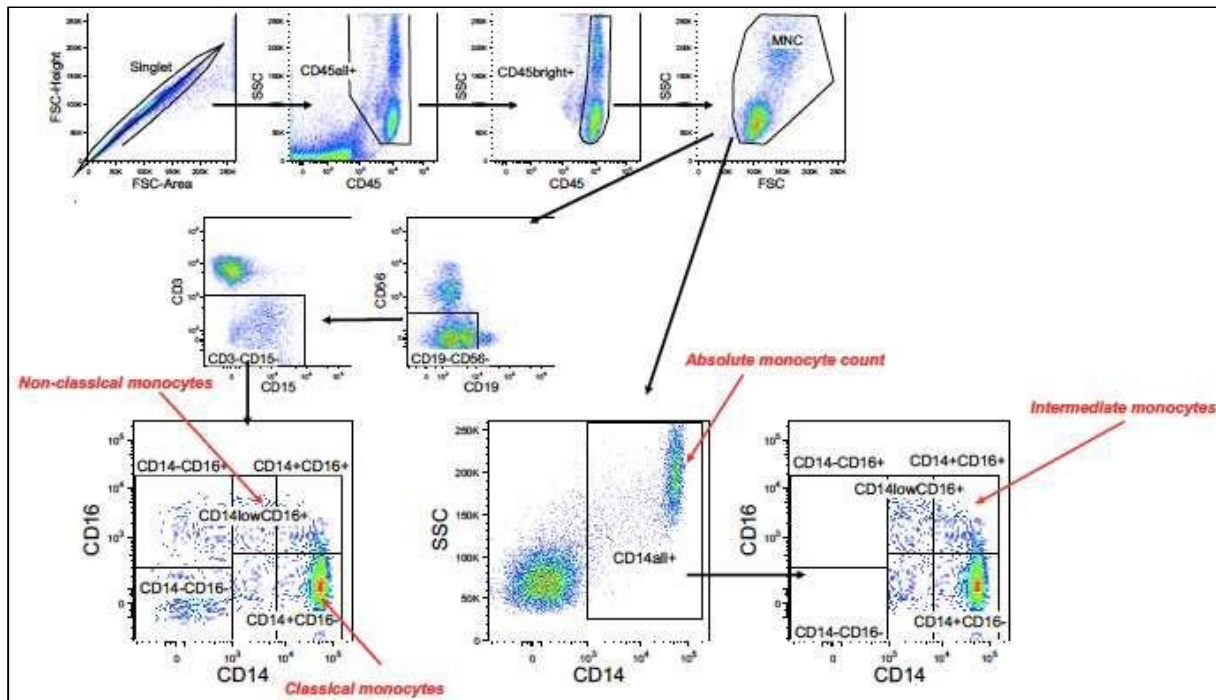

Supplement: NIHMS1521102-supplement-1.pdf [file NIHMS1521102-supplement-1.pdf]
